# Supplementary material for: Sustained high expression of BTLA on CD4+ T cell contributes to high rate of bacterial infection and mortality in patients with HBV-related acute-on-chronic liver failure via CD4+ T cell exhaustion
Source: Research Square preprint supplement (doi:10.21203/rs.3.rs-2190871/v1), 2022-10-31
Supplement: Supplementary file 1 [file f0b07c6c52eca93e1be8c366.docx]

**Supplementary Materials for**

**Sustained high expression of BTLA on CD4+ T cell contributes to high rate of bacterial infection and mortality in patients with HBV-related acute-on-chronic liver failure via CD4+ T cell exhaustion**

Xueping Yu 1, 2, 9, Feifei Yang 1, 9, Jian Sun 1, Chao Qiu 1, Yijuan Zheng 2, Weidong Zhao 3, Songhua Yuan 4, Dawu Zeng 5, Jianfei Long 1, Mengqi Zhu 1, Xueyun Zhang 1, Jingwen Wu 1, Zhenxuan Ma 1, Haoxiang Zhu 1, Milong Su 2, Jianqing Xu 4, Bin Li 6, Richeng Mao 1✉, Zhijun Su 2✉, Jiming Zhang 1, 7, 8✉

9 These authors contributed equally: Xueping Yu and Feifei Yang.

✉email: [jmzhang@fudan.edu.cn](mailto:jmzhang@fudan.edu.cn); [su2366@sina.com](mailto:su2366@sina.com); njxiaomao@163.com.

This PDF file includes:

Materials and Methods

Supplementary Figure 1. Expression of BTLA and HVEM on T cells, NK cells, and dendritic cells (DC)

Supplementary Fig. 2. BTLA expression is significantly increased in the Tem subtype, in all subgroups of circulation CD4+T cells, and in intrahepatic CD4+T cells of HBV-ACLF patients.

Supplementary Fig. 3. BTLA+CD4+T cells positively correlated with severity of disease, prognosis, and infectious complications.

Supplementary Fig. 4. BTLA expression on CD4+ T cells were induced by IL-6 and TNF-α.

Supplementary Fig. 5. CD4+T cells tend to be exhausted in HBV-ACLF and exhaustion is associated with poor prognosis.

Supplementary Fig. 6. Time- and dose-dependent inhibition of CD4+T cell activation by anti-BTLA.

Supplementary Fig. 7. BTLA inhibited activation, proliferation, and secretory cytokines, but promoted the apoptosis of CD4+T cells from the peripheral blood of NC, CHB, and HBV-ACLF patients.

Supplementary Fig. 8. Anti-BTLA crosslinking increases gene expression changes in NC, CHB, and HBV-ACLF patients.

Supplementary table 1. Demographic and clinical characteristics of subjects.

Supplementary table 2. Specific primers for BTLA, stat3, 16S, and β-actin

**Supplementary Materials**

**Materials and Methods**

**Hematologic, biochemical, and virological parameters**

Albumin (ALB), TBil, direct bilirubin (DBil), ALT, aspartate aminotransferase (AST), cholinesterase (CHE), white blood cell (WBC) count, neutrophil count, hemoglobin (Hgb), prothrombin time (PT), INR, C-reactive protein (CRP), procalcitonin (PCT), HBsAg, hepatitis B virus e antigen (HBeAg), and hepatitis B virus DNA were documented at the time of admission. The Child–Pugh model of end-stage liver disease (MELD) was used, and the Child–Pugh score was calculated as previously described.1

**Cell isolation and sorting**

Peripheral blood mononuclear cells (PBMC) were isolated from ethylenediamine tetraacetic acid-anticoagulant venous blood using Ficoll-Hypaque density gradient centrifugation (Cedarlane Laboratories) as previously described.2 Fresh liver tissues were cut out. Next, the single-cell suspension was collected and washed with phosphate-buffered saline. Afterward, the cell suspension was resuspended in 40% Percoll (Sigma-Aldrich) and gently overlaid onto 70% Percoll and centrifuged for 20 min at 2000 rpm. Liver-infiltrating lymphocytes were collected from the interface.3 Peripheral blood CD4+T cells were purified using magnetic beads (Miltenyi Biotec) at a purity level of ≥90%. BTLA+CD4+T cells and BTLA-CD4+T cells were sorted using a MoFlo XDP cell sorter (Beckman Coulter) with a purity >95%.

**Flow cytometry**

To detect the expression and distribution of BTLA in liver-infiltrating lymphocytes and circulating CD4+T cell subtypes, as well as the phenotypic differentiation of BTLA+CD4+T cells, PBMC from NC, CHB, and HBV-ACLF patients were labeled with the following monoclonal antibodies (mAbs): APC anti-human CD3 (Biolegend), BV510™ anti-human CD4 (BD Biosciences), Phycoerythrin/Cy7 anti-human CD8 (BD Biosciences), Percp/Cy5.5 anti-human BTLA (Biolegend), FITC anti-human CD27 (Biolegend), and APC/Cy7 anti-human CD45RA (Biolegend).

To investigate the expression of BTLA in the circulation, CD4+T cell subgroups and PBMC from NC, CHB, and HBV-ACLF patients were labeled with the following mAbs: APC anti-human CD3 (Biolegend), Brilliant Violet 510™ anti-human CD4 (BD Biosciences), Percp/Cy5.5 anti-human BTLA (Biolegend), BV510™ anti-human CCR4 (Biolegend), APC/Cy7 anti-human CCR6 (Biolegend), PE anti-human CCR10 (Biolegend), BV421™ anti-human CXCR3 (Biolegend), and phycoerythrin/Cy7 anti-human CXCR5 (Biolegend). Data acquisition and analysis were performed with MoFlo XDP (Beckman, USA).

For characterizing the phenotype of BTLA+CD4+T cells, PBMC from NC, CHB, and HBV-ACLF patients were labeled with the following mAbs: APC AF750 anti-human CD3 (Beckman), ECD anti-human CD4 (Beckman), FITC anti-human CCR5 (Biolegend), PE anti-human BTLA (Biolegend), PC5.5 anti-human CD127 (Beckman), PC7 anti-human CD64 (Beckman), APC anti-human CD25 (Beckman), APC AF700 anti-human CD7 (Biolegend), and PB anti-human CD57 (Beckman). Controls for each experiment included unstained cells and cells that were single-stained for surface markers or intracellular proteins.

**Immunofluorescence double-staining**

For immunofluorescence double-staining, sections were deparaffinized with xylene and ethyl alcohol and quickly rinsed with TBST buffer for 5 min. After blocking with 5% normal serum-TBST for 1 h, sections were incubated with mouse monoclonal anti-CD4 (eBioscience, USA), anti-BTLA (Abcam, USA) antibodies at 4 °C overnight. After washing with TBST (5 min, 3 times), sections were incubated with donkey anti-rabbit Alexa 488 and donkey anti-mouse Alexa 555 (Jackson ImmunoResearch, West Grove, PA, USA) in the dark for 30 min. Finally, sections were incubated with 1 μg/mL DAPI (Sigma, CA, USA) for 10 min to stain nuclei. The results were analyzed using an inverted Eclipse Ti-S microscope (Nikon, Japan). Liver sections were stained with hematoxylin & eosin (H&E).

**Determination of cytokine/chemokine concentrations**

Levels of pro-inflammatory cytokines (IL-1β, IL-6, TNF-α, IL-4, IL-17A, IFN-γ, and IL-12), anti-inflammatory cytokines (IL-10), and other chemokines (GM-CSF, FGF2, MDC, IP-10, MCP-1, and MIP1-α) in the plasma of patients were determined using the Luminex 200 multiplexing instrument (EMD Millipore, USA). Plasma levels of IL-37, IL-21, and IL-22 were measured using an ELISA kit (RayBiotech Inc, Norcross, GA, USA) according to the manufacturer’s protocol.

**Induction of BTLA expression on CD4+T cells in vitro**

PBMC from healthy donors were cultured in complete medium (RPMI 1640 supplemented with 10% heat-inactivated FBS, 100 U/mL penicillin and 100 µg/mL streptomycin [Life Technologies]) at a concentration of 1×106 cells/mL for 3, 5, and 7 days with the plasma of HBV-ACLF and NC, or various concentrations (10~50 ng/mL) of recombinant human (rh) interleukin rhIL-1β (PeproTech), rhIL-6 (PeproTech), rhIL-10 (PeproTech), rhIL-22 (PeproTech), rhIL-37 (R&D), and tumor necrosis factor (rhTNF-α, PeproTech). The medium and cytokines were refreshed every other day. The expression of BTLA in CD4+T cells was analyzed using flow cytometry.

PBMC from healthy donors were cultured at a concentration of 1×106 cells/mL in complete medium and were treated for 3 days according to the following groupings: (a) control; (b) stimulant alone: rhIL-6 alone (50 ng/mL), or rhTNF-α (50 ng/mL); (c) inhibitor alone: anti-stat3 (SH-4-54, 50 μmol/L, Selleck) or the anti-NF-kb (QNZ, 20 μmol/L, Selleck) or Polymyxin B (PXB, 10 μg/mL, Sigma-Aldrich); and (d) stimulant plus inhibitors. All experiments were performed at least in duplicate.

**Quantification of BTLA expression and bacterial 16S rDNA using RT-PCR**

To measure mRNA expression of *BTLA* and *Stat3*, samples were obtained from PBMC of study subjects or from BPMCs treated by recombinant human cytokines. Total RNA was extracted by Trizol (Invitrogen) and reverse-transcribed into complementary DNA (cDNA) using a Fast Quant RT Kit (Tiangen). Expression levels were quantified via real-time PCR (SYBR® Premix Ex Taq II, Tiangen) according to the manufacturer’s instructions. The procedure for the detection of bacterial 16S rDNA in whole blood of mouse models was carried out as previously reported.4 Specific primers for BTLA, stat3, 16s, and β-actin were designed (Supplemental table 1). Values were calculated as the difference in cycle threshold (Ct) values normalized to those of mRNA encoding β-actin for each sample using the following formula: relative RNA expression = 2–∆Ct) × 103.

**Electroporation with BTLA shRNA**

PBMC from healthy donors were divided into three groups: BTLA shRNA, control shRNA, and GFP. Cell concentrations were adjusted to 5–10×106 using RPM-1640 (Corning, USA). The required numbers of cells were pelleted and the supernatant was completely discarded. Next, the PBMC were carefully resuspended with 2 μL pmaxGFP® Vector, plus 2 μL BTLA shRNA or 2 μL control shRNA in 100 μL room-temperature Nucleofector® Solution, which was mixed with transfection solution and complete supplement solution at a ratio of 4.5:1. The PBMC suspension was transferred into a certified cuvette. Afterward, 500 μL of pre-preheated free serum-X-VIVO medium was quickly added to the three cuvettes, and the PBMC were gently resuspended and transferred to 12-well plates (final volume of each 2 mL). The PBMC were incubated at 37 °C in 5% CO2 for 3 d, and only PBMC with decreased expression of BTLA were used in subsequent experiments.

**T cell activation assay**

Untreated control PBMC or PBMC knocked down by shRNA from healthy donors were stimulated with anti-CD3/CD28 antibodies (1 mg/mL; eBioscience, San Diego, CA) in medium with plate-coated anti-BTLA (10 μg/mL; eBioscience, San Diego, CA) or PBS (Corning, USA) for 1 day. The cells were then selected, and the expression of CD25, CD38, and CD69 was analyzed via flow cytometry.

**Proliferation assay**

Untreated control PBMC, PBMC knocked down by shRNA, or sorted BTLA+CD4+T cells and BTLA-CD4+T cells from healthy donors were labeled with 2.5 mM carboxyfluorescein succinimidylester (CFSE) (Thermo, USA) for 15 min at 37°C. CFSE-labeled cells were cultured in 96-well plates with anti-CD3/CD28 antibodies (1 mg/mL; eBioscience, San Diego, CA) in medium, with plate-coated anti-BTLA (10 μg/mL; eBioscience, San Diego, CA) or PBS for 5 days. The cells were then selected and the CFSE dilution was evaluated by flow cytometry.

**Annexin V-apoptosis assay**

Untreated control PBMC or PBMC knocked down by shRNA from healthy donors were treated in 96-well plates with plate-coated anti-BTLA (10 μg/mL; eBioscience, San Diego, CA) or PBS for 1 d, washed with PBS followed by costaining with Annexin V and PI (BD Bioscience). The apoptosis rate was measured by flow cytometry.

**Analysis of cytokine production**

Untreated PBMC, PBMC knocked down by shRNA, or sorted BTLA+CD4+T cells and BTLA-CD4+T cells from healthy donors were stimulated in 96-well plates with PMA/ionomycin/BFA (sigma-Aldrich), with or without plate-coated anti-BTLA (10 μg/mL; MIH26, eBioscience, San Diego, CA) or PBS for 5 h. The cells were labeled with surface antibodies (APC anti-human CD3 and FITC anti-human CD4) and then fixed and permeabilized using the Cytofix/Cytoperm Plus kit (BD Biosciences). Lastly the cells were stained with intracellular antibodies (BV421 anti-human IFN-γ, PE anti-human IL-2, and APC/Cy7 anti-human TNF-α). All antibodies were purchased from BD Bioscience (San Jose, CA, USA).

**Whole-transcriptome library preparation and sequencing**

PBMC from 3 healthy donors, 3 CHB patients, and 3 HBV-ACLF patients were treated in 96-well plates with plate-coated anti-BTLA (10 μg/mL; eBioscience, San Diego, CA) or PBS for 12 h. The BTLA+CD4+T cells and BTLA-CD4+T cells were sorted with a MoFlo XDP cell sorter (Beckman Coulter) with a purity of >95%. Total RNA from PBMC or sorted T cells were extracted using the miRNeasy Mini Kit (Qiagen) following the manufacturer’s instructions, and the RNA integrity number (RIN) was obtained using an Agilent Bioanalyzer 2100 (Agilent technologies, CA, USA). Qualified total RNA was further purified by the RNA Clean XP Kit (Beckman Coulter, Inc. CA, USA) and the RNase-Free DNase set (QIAGEN, GmBH, Germany). Ribosomal RNA (rRNA) was removed by Agencourt® AMPure XP Beads (Beckman Coulter, Inc. CA, USA) according to the manufacturer’s instructions. Subsequently, strand-specific sequencing libraries were generated by Superscript II Reverse Transcriptase (Invitrogen, USA). Library quality was assessed using the Agilent High Sensitivity DNA Kit (Agilent technologies, CA, USA). RNA sequencing (RNA-Seq) was performed on an Illumina Hiseq 2000 platform, and 100 bp paired-end reads were generated according to Illumina’s protocol.

**Protein isolation and western blotting**

Purified CD4+T cells from healthy donors were treated in 96-well plates with plate-coated anti-BTLA (10 μg/mL; eBioscience, San Diego, CA) or PBS for 12 h, and were scraped and transferred into Eppendorf tubes, which were then centrifuged at 3, 000 rpm for 5 min with the cells precipitated at the bottom of the Eppendorf tubes. The cells were then lysed in radioimmunoprecipitation assay (Absin Bioscience, Beijing) lysis buffer containing phenylmethanesulfonylfluoride. Protein concentrations were measured using a bicinchoninic acid kit (Sigma-Aldrich, USA). The samples were separated using SDS-PAGE and then transferred onto a polyvinylidene difluoride (PVDF) membrane (Millipore, USA). The PVDF membrane was blocked with 5% nonfat milk and incubated with the following primary antibodies: PI3K, phospho-PI3K, Akt, phospho-Akt, phospho-GSK-3β, CREB, phospho-CREB, and phospho-SHP1/SHP2 (Cell Signaling Technology, Beverly, Mass). GAPDH (Biodesign International, Saco, Maine) was used as the loading control. The blots were incubated with the horseradish peroxidase-conjugated secondary antibodies (Santa Cruz Biotechnology) for 1 h at room temperature.

**Animal Model**

Wild type (WT) and BTLA-/- C57BL/6 mice, both 8 weeks old and weighing 20 ± 1 g, were purchased from the Shanghai Model Organisms Center, Inc (Shanghai, China). They were bred in a specific pathogen-free barrier facility. All animal experiments were approved by the Ethics Committee of Shanghai Public Health Clinical Center and the Institutes of Biomedical Science, Shanghai Medical College, Fudan University. For the ACLF model, Concanavalin A (ConA, 8 mg/kg, Sigma-Aldrich, USA) in 0.9% saline was injected into the retrobulbar angular vein every 2 days for 8 times. The peripheral blood and the liver tissues were harvested on the indicated days, and the mice were euthanized after the last injection.

A septicemia model induced by cecal ligation and puncture (CLP) was established as previously described5. Mice were anesthetized with ketamine and xylazine, and a 1cm midline incision was made in the abdomen to expose the cecum. The cecum was ligated from the end and then punctured twice with a 21-gauge needles. The abdominal incision was closed using two or three surgical wound clips, and the mice were resuscitated with 1 mL sterile saline.

**Statistics**

GraphPad Prism 7.0 (GraphPad Software Inc., San Diego, California, USA) software was used. Data were calculated as medians and interquartile ranges. Comparisons of data between or among groups were performed using the Wilcoxon test, the Mann-Whitney *U* test, or one-way ANOVA followed by the Fisher’s LSD multiple-comparison test, as appropriate. A correlation analysis was performed using the Spearman tests. A *P* value < .05 was considered significant. **P* < 0.05, ***P* < 0.01.

**Supplemental figure legends**


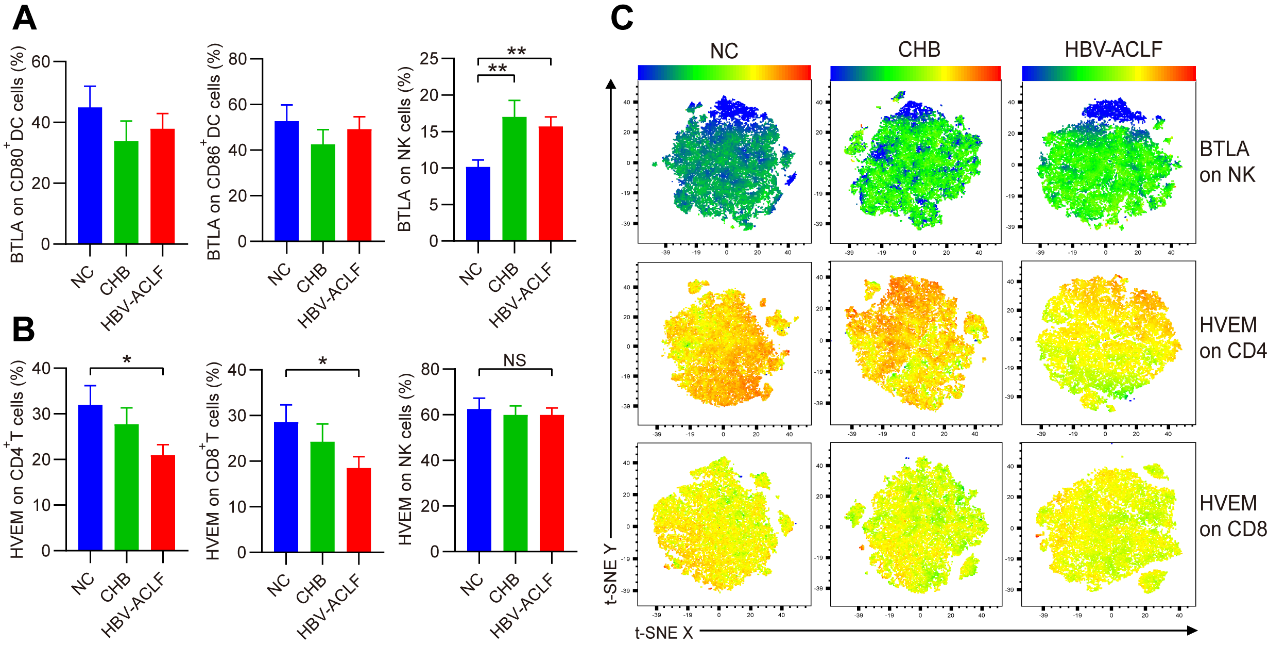


**Supplemental Fig. 1 Expression of BTLA and HVEM on T cells, NK cells, and dendritic cells (DC).** (*A*) Expression of BTLA on NK cells, but not on CD80/86+ DC, was increased in CHB (*n* = 27) and HBV-ACLF patients (*n* = 35) compared with that in NC (*n* = 20). (*B*) Expression of HVEM on CD4/CD8+ T cells, but not on NK cells, was decreased in patients with HBV-ACLF (*n* = 35) compared with that in NC (*n* = 20). (*C*) T-distributed stochastic neighbor embedding (t-SNE) was used to determine the expression of BTLA and HVEM on NK cells or CD4/CD8+ T cells in NC, CHB, and HBV-ACLF patients. One-way ANOVA followed by Fisher’s LSD multiple-comparison test (*A, B, C*), **P < .*05, ***P < .*01, and ****P < .*001.

**
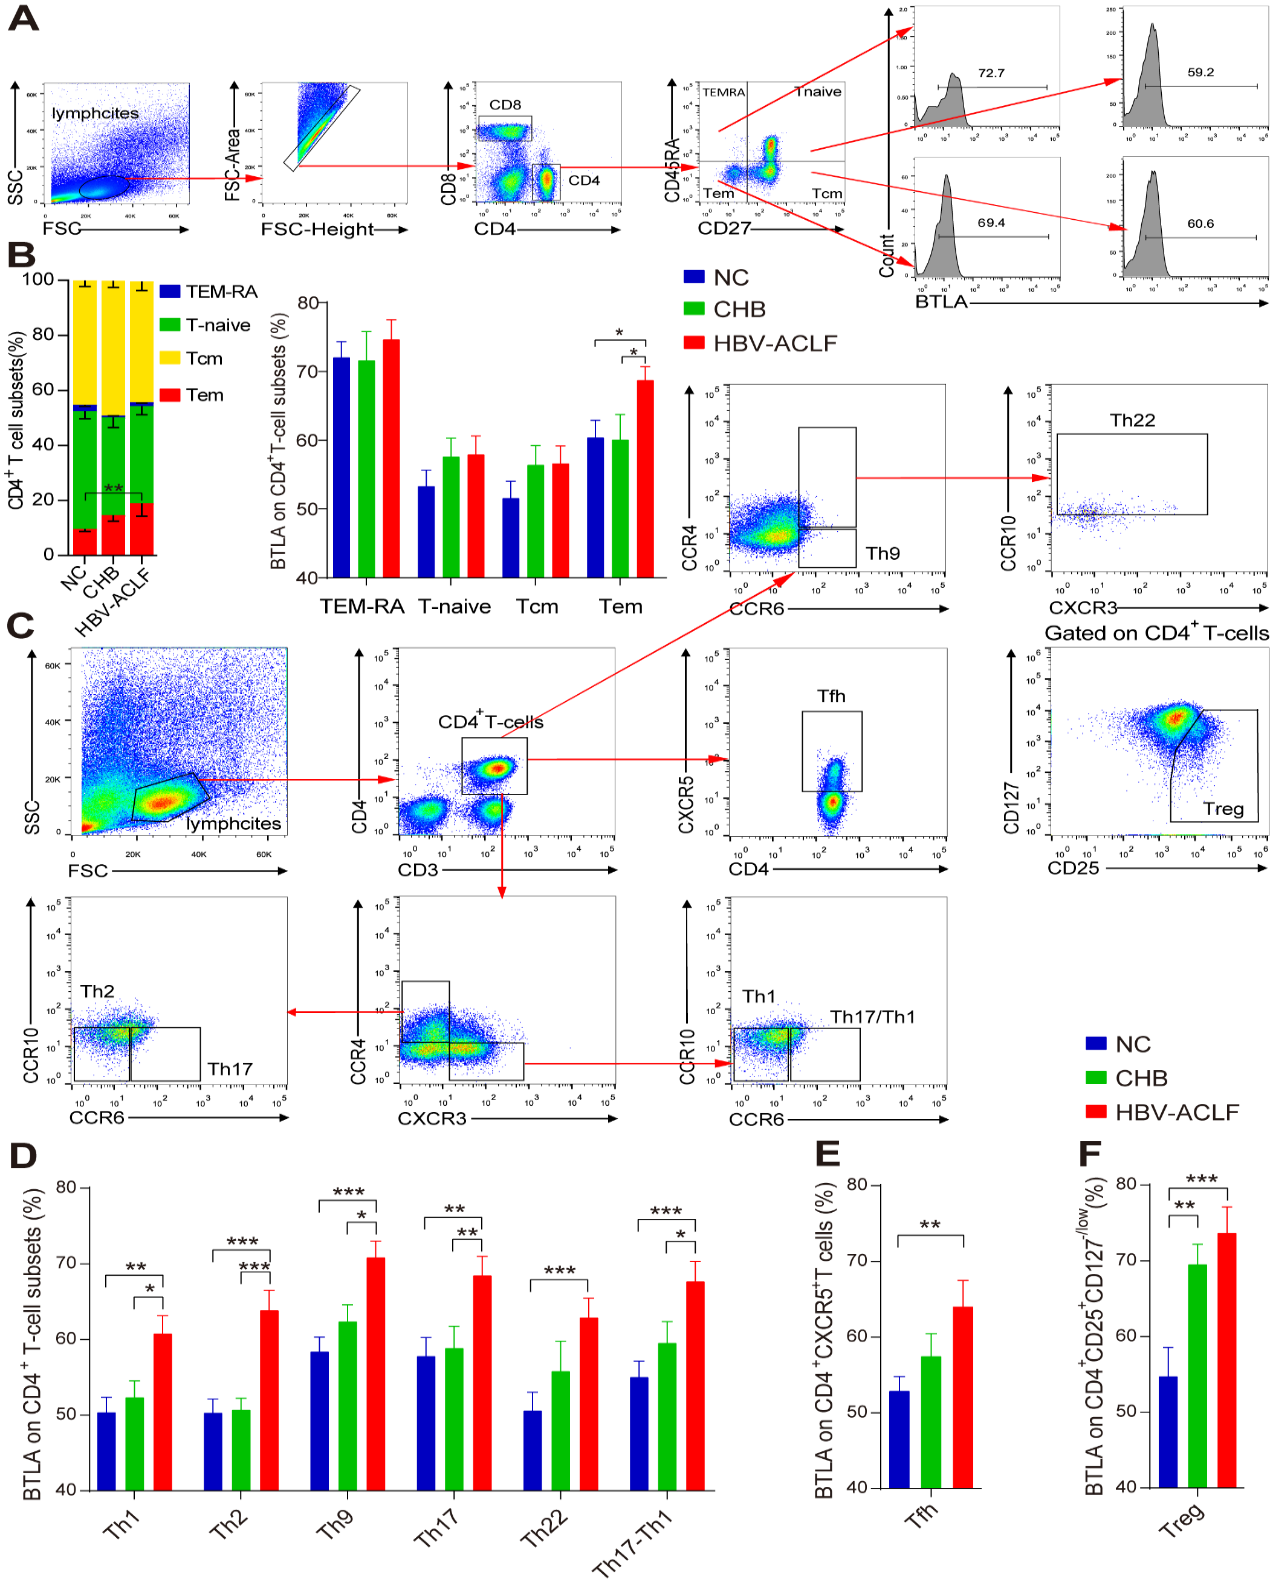
**

**Supplemental Fig. 2 BTLA expression is significantly increased in the Tem subtype, in all subgroups of** **circulation CD4+T cells of HBV-ACLF patients.** (*A*) Flow cytometry diagram of BTLA expression in T-effector memory re-expressing CD45RA (TEM-RA), naive T cells (T naive), central memory T cells (Tcm), and effector memory T cells (Tem, classified according to CD27 and CD45RA. (*B*) Frequencies of subtypes of CD4+T cells (TEM-RA, T naïve, Tcm, and Tem) and the expression of BTLA in these cell subtypes from NC (*n* = 27), CHB (*n* = 22), and HBV-ACLF patients (*n* = 13). (*C*) Sequential gating strategy for the subgroups of CD4+T cells (Th1, Th2, Th9, Th17, Th17-Th1, Th22, Tfh, and Treg cells) 6. (*D, E, F*) BTLA expression in the Th1, Th2, Th9, Th17, Th22, Th17-Th1, Tfh (*E*), and Treg (*F*) cells subgroups increased in HBV-ACLF patients (*n* = 32) compared with NC (*n* = 20) and CHB (*n* = 22). One-way ANOVA followed by Fisher’s LSD multiple-comparison test (*D, E, F*), **P < .*05, ***P < .*01, and ****P < .*001.


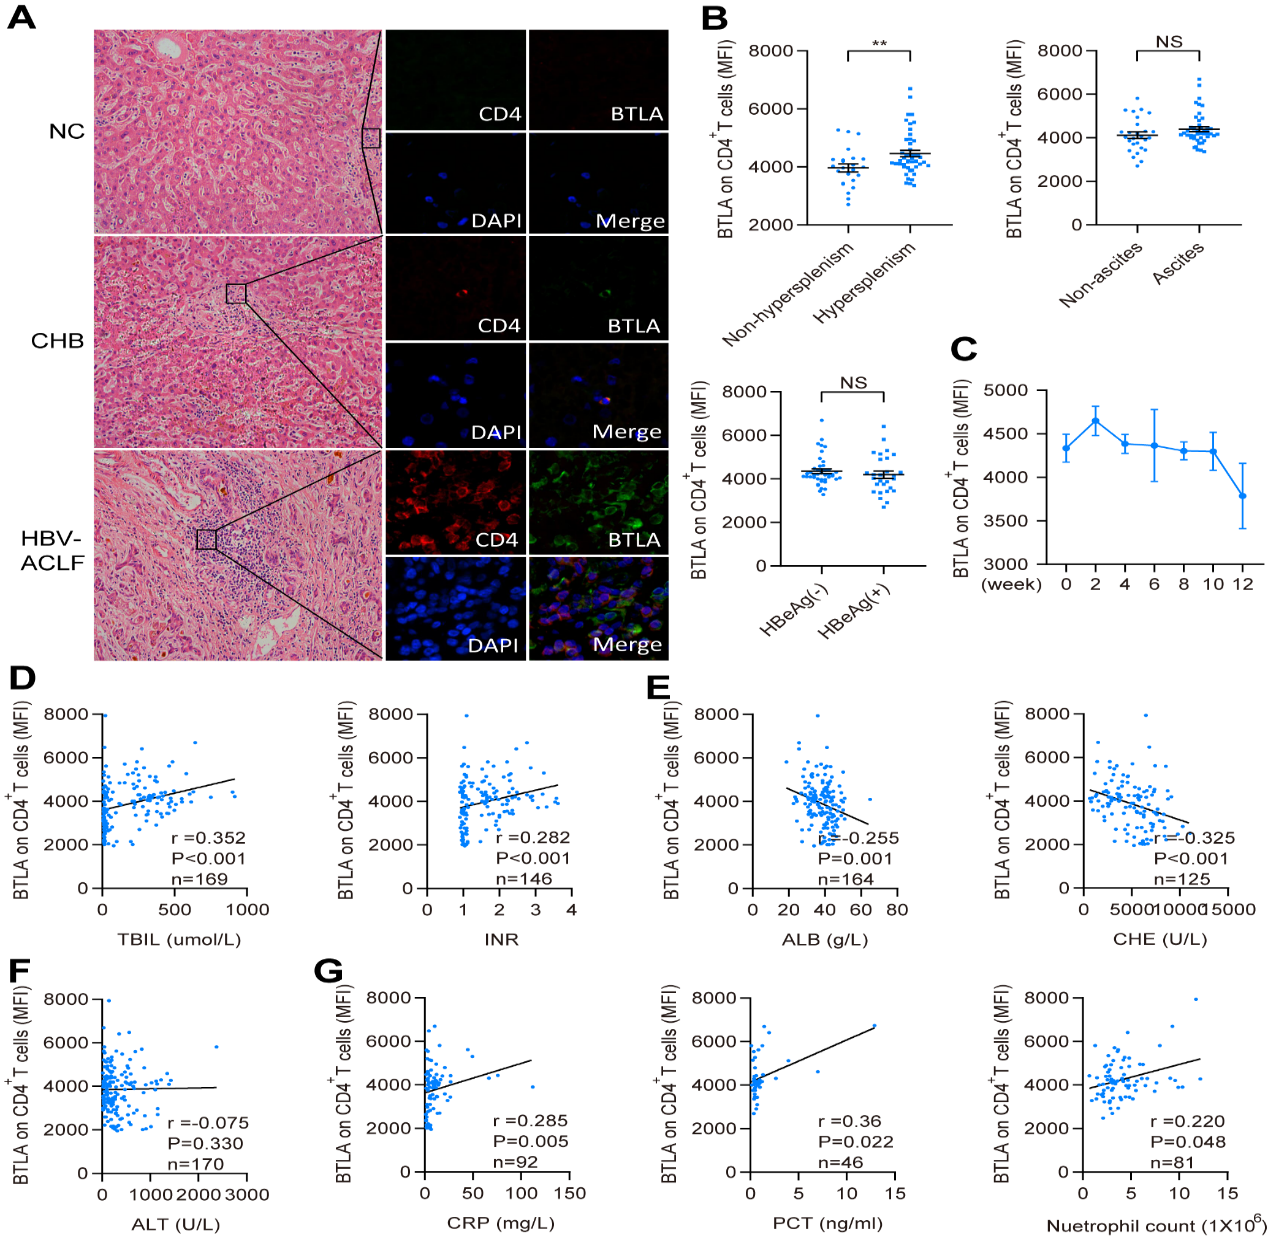


**Supplemental Fig. 3 BTLA+CD4+T cells positively correlated with severity of disease, prognosis, and infectious complications.** (*A*) The number of CD4+BTLA+ cells in liver tissue were significantly higher in HBV-ACLF patients than in NC or CHB patients. (*B*) There were no significant differences between HBV-ACLF patients with or without ascites complications, or between HBeAg-positive and HBeAg-negative patients (*n* = 71). (*C*) After comprehensive treatment, the MFI of BTLA expression on CD4+ T cells in patients with HBV-ACLF gradually decreased (*n* = 20). (*D-G*) The frequency of CD4+BTLA+ T cells was positively correlated with physiological and biochemical indices of liver injury (TBil, INR) and systemic inflammation (neutrophil count, CRP, and PCT), but negatively correlated with compensatory indices of liver function (ALB, Hgb, and CHE). Mann-Whitney *U* test (*B*) and Spearman tests (*D-G*), **P < .*05.


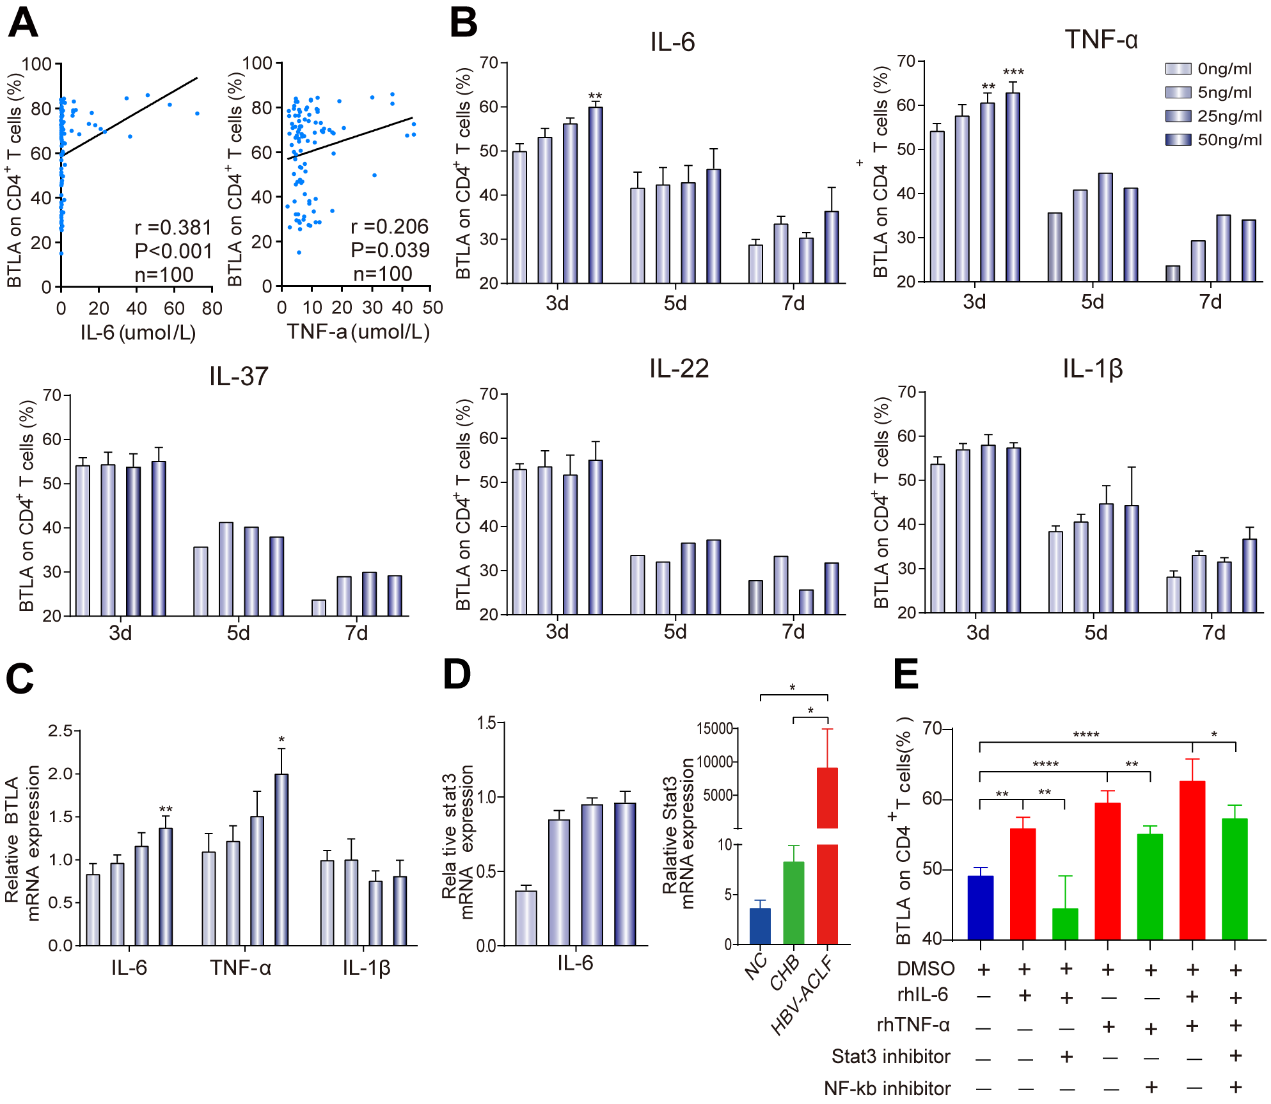


**Supplemental Fig. 4 BTLA expression on CD4+ T cells were induced by IL-6 and TNF-α.** (*A*) The levels of IL-6 (left) and TNF-α (right) were significantly and positively correlated with BTLA expression in CD4+T cells. (*B*) The expression of BTLA on CD4+ T cells was higher at day 3 than at days 5 or 7 upon exposure of PBMC to recombinant human (rh) IL-1β, rhIL-6, rhIL-22, rhIL-10, rhIL-37, and rhTNF-α. (*C*) rhIL-6 and rhTNF-α induced the up-regulation of BTLA mRNA levels in a dose-dependent manner (*n* = 6). (*D*) The levels of Stat3 mRNA (right) in HBV-ACLF patients were significantly higher than those in NC and CHB patients, and rhIL-6 (left) significantly increased the levels of Stat3 mRNA in a dose-dependent manner (*n* = 6). (*E*) Exposure to rhIL-6 plus anti-stat3 or rhTNF-α plus anti-NF-kb resulted in a significant decrease in BTLA expression in CD4+T cells compared with exposure to only rhIL-6 or rhTNF-α (*n* = 10). One-way ANOVA followed by Fisher’s LSD multiple-comparison test (*D*), and Wilcoxon test (*B, C, E*), **P < .*05, and ***P < .*01.

**
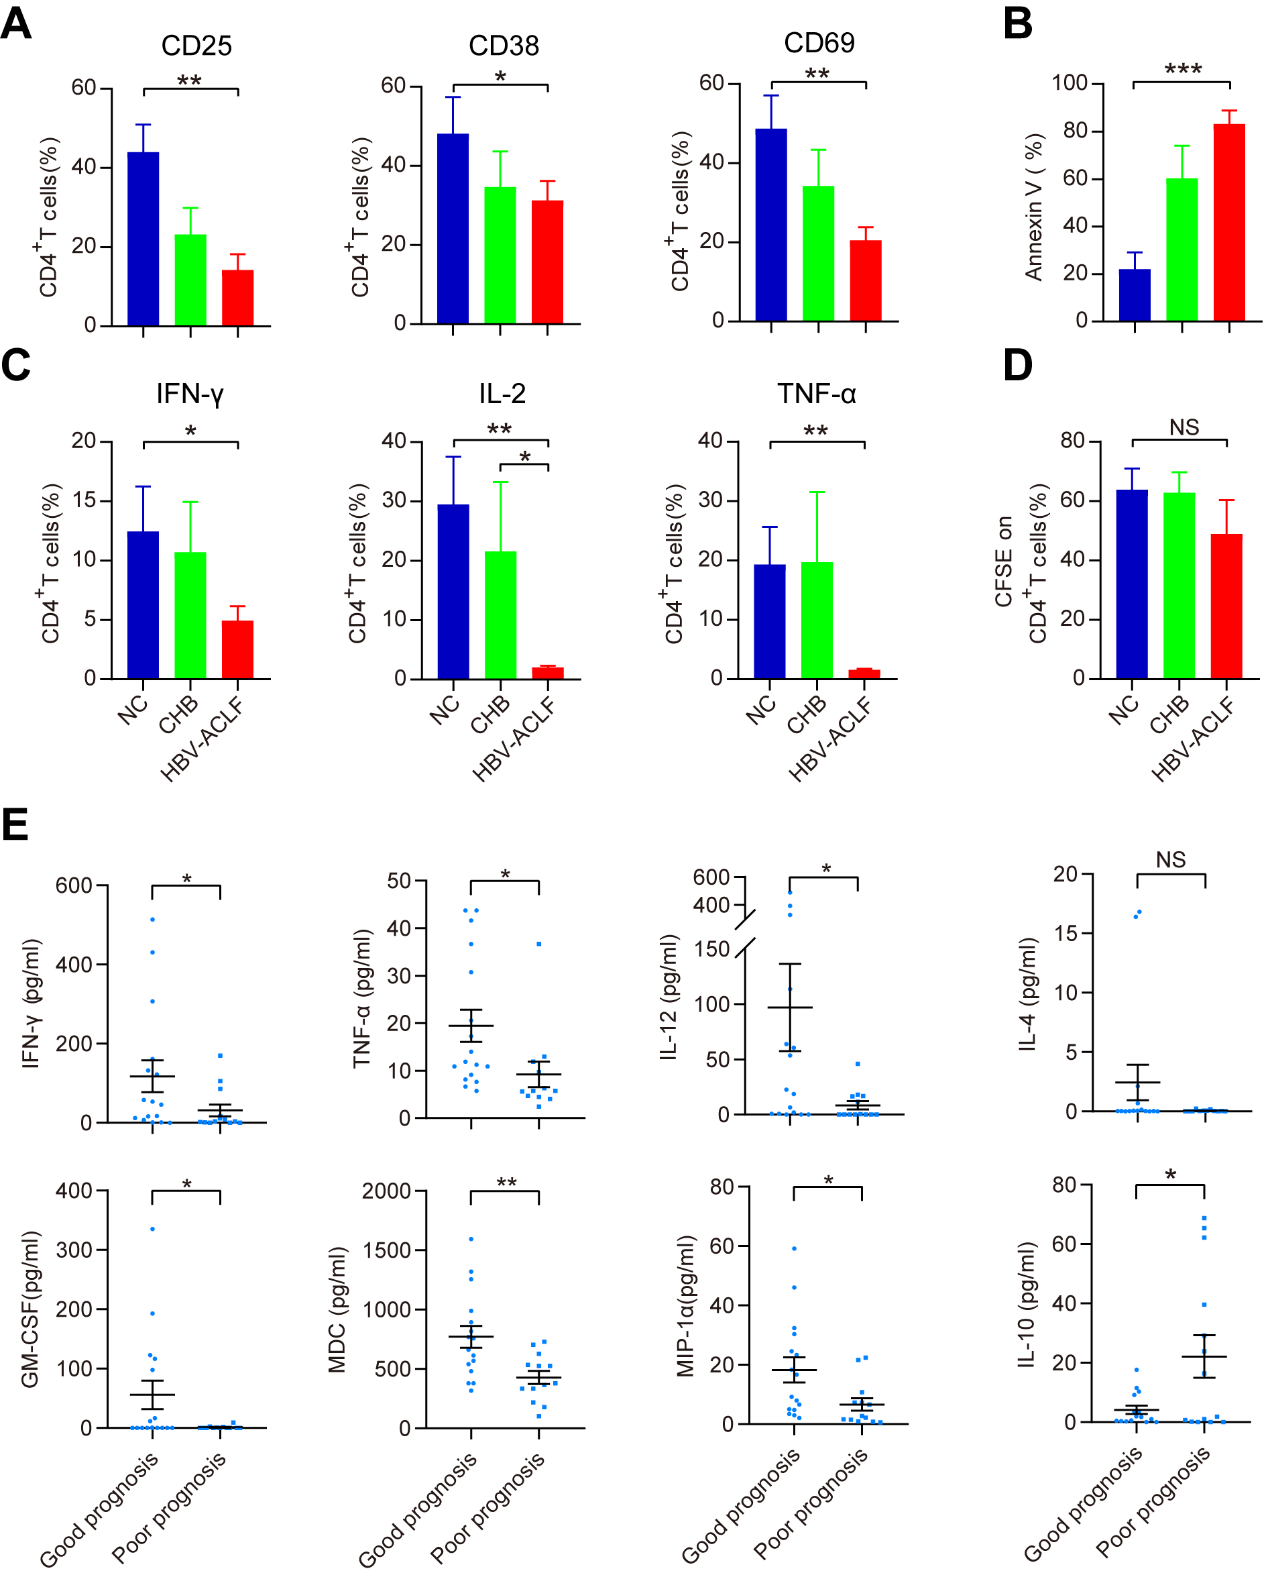
**

**Supplementary Fig. 5 CD4+T cells tend to be exhausted in HBV-ACLF and exhaustion is associated with poor prognosis.** (*A, B, C, D*) HBV-ACLF patients displayed a decreased ability of activation, proliferation, and secretory cytokines, but had an increased apoptosis rate in CD4+T cells (NC:10, CHB:10, HBV-ACLF:8). (*E*) HBV-ACLF patients with poorer prognoses displayed lower plasma levels of Th1-like (IFN-γ and TNF-α) and Th2-like (IL-12 and IL-4) cytokines, as well as other chemokines (GM-CSF, MDC, and MIP-1α), but higher levels of IL-10 compared with HBV-ACLF patients with better prognosis. One-way ANOVA followed by Fisher’s LSD multiple-comparison test (*A, B, C, D*), and Mann-Whitney *U* test (*E*), **P < .*05, ***P < .*01, and ****P < .*001.


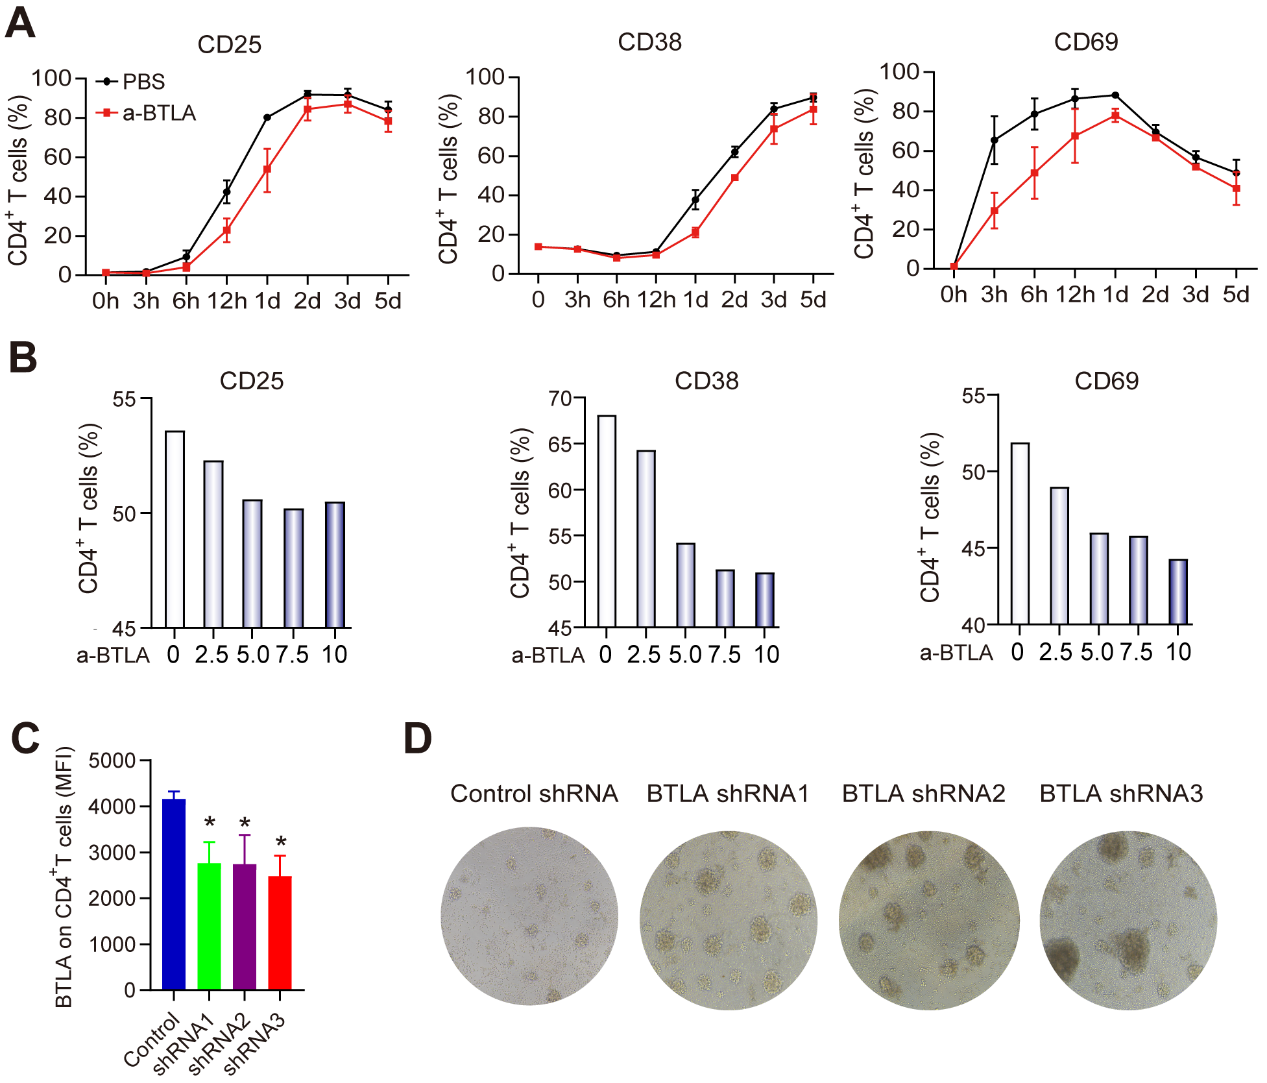


**Supplementary Fig. 6 Time- and dose-dependent inhibition of CD4+T cell activation by anti-BTLA.** (*A*) and (*B*) Crosslinking of BTLA showed the strongest ability to suppress CD4+ T cells activation upon 1 d of anti-BTLA stimulation (*A, n = 2*) at a concentration of 10 μg/mL (*B, n = 1*). (*C*) Three specific BTLA shRNA could inhibit the expression of BTLA on CD4+T cells (*n = 3*). (*D*) After crosslinking of BTLA using an agonistic anti-BTLA monoclonal antibody, the proliferation of CD4+T cells was significantly increased in the three specific BTLA shRNA groups compared with the control shRNA group. Mann-Whitney *U* test, **P < .*05.

**
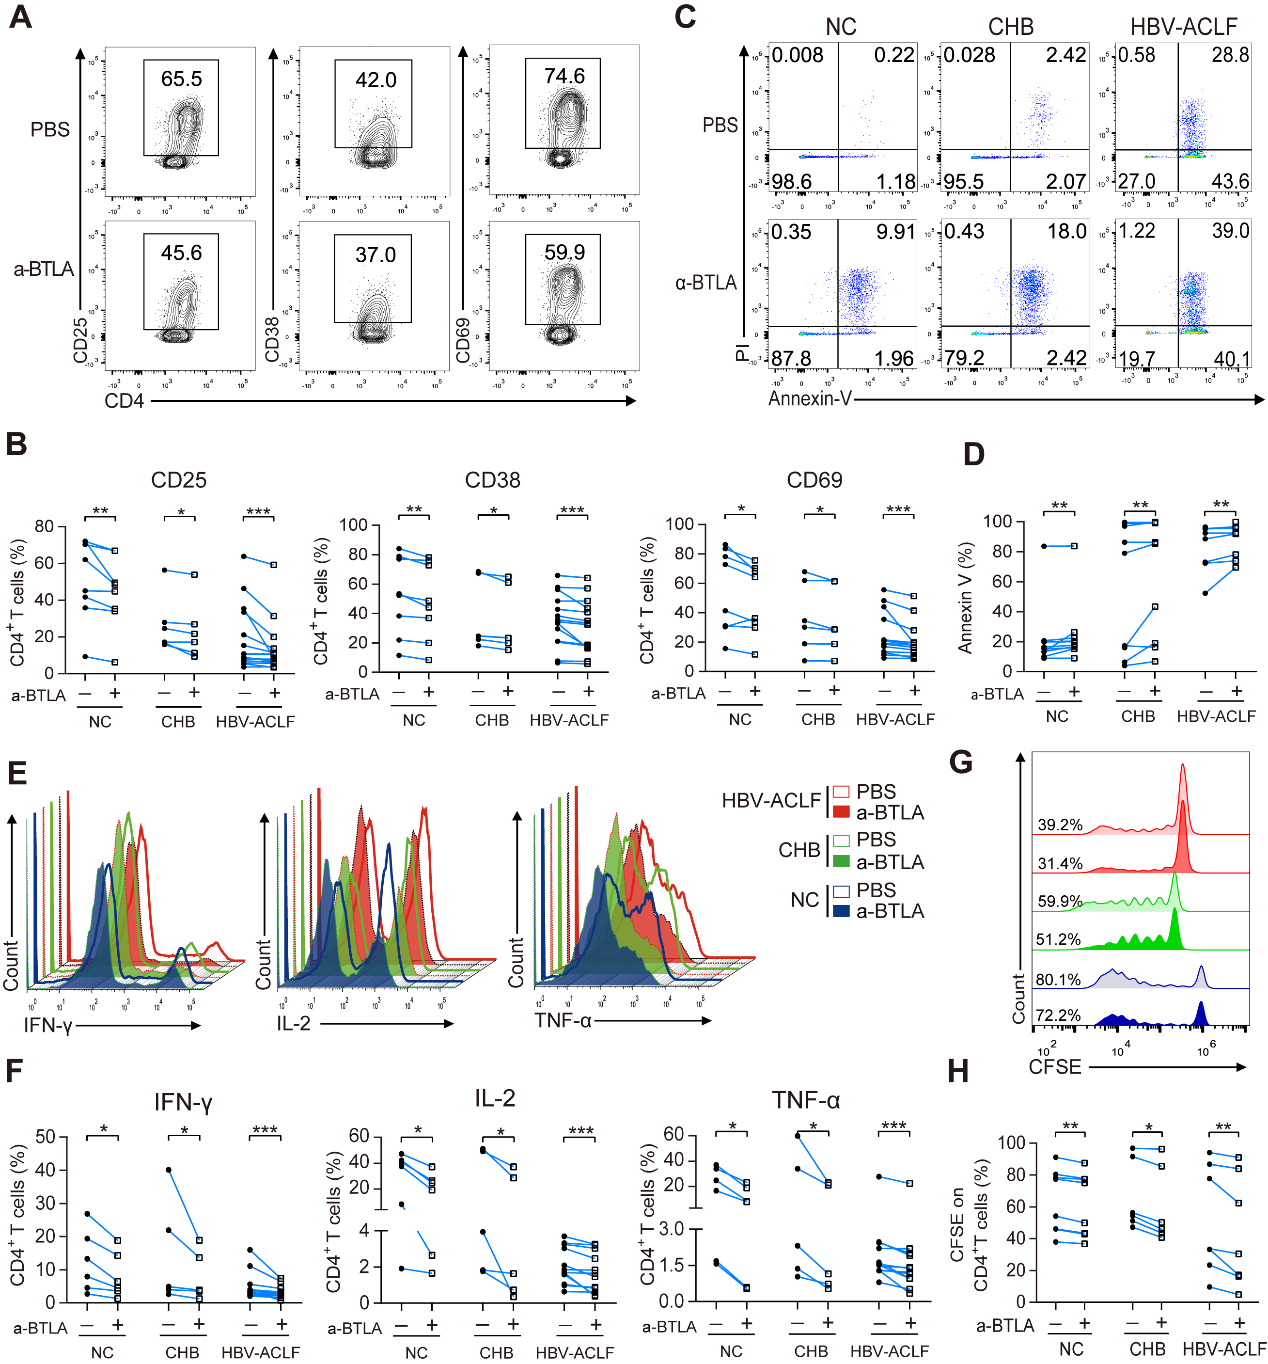
**

**Supplementary Fig. 7 BTLA inhibited activation, proliferation, and secretory cytokines, but promoted the apoptosis of CD4+T cells from the peripheral blood of NC, CHB, and HBV-ACLF patients.** (*A*, *B*) Contour plots (top) and bar graphs (bottom) showing that crosslinked BTLA markedly inhibited the expression of activation markers (CD25, CD38, and CD69, NC:8, CHB:6, HBV-ACLF:14). (*C*, *D*) Contour plots (top) and bar graphs (bottom) showing that crosslinked BTLA markedly promoted the apoptosis of CD4+ T cells (NC:10, CHB:10, HBV-ACLF:8). (*E*) and (*F*) Contour plots (top) and bar graphs (bottom) showing that crosslinked BTLA markedly inhibited the production of IFN-γ, IL-2, and TNF-α induced by PMA/ionomycin (NC:6, CHB:5, HBV-ACLF:12). (*G*, *H*) Contour plots (top) and bar graphs (bottom) showing that crosslinked BTLA markedly inhibited the proliferation ofCD4+T cells (NC:8, CHB:6, HBV-ACLF:8). Wilcoxon test (*B, D, F, H*), **P < .*05, ***P < .*01, and ****P < .*001.


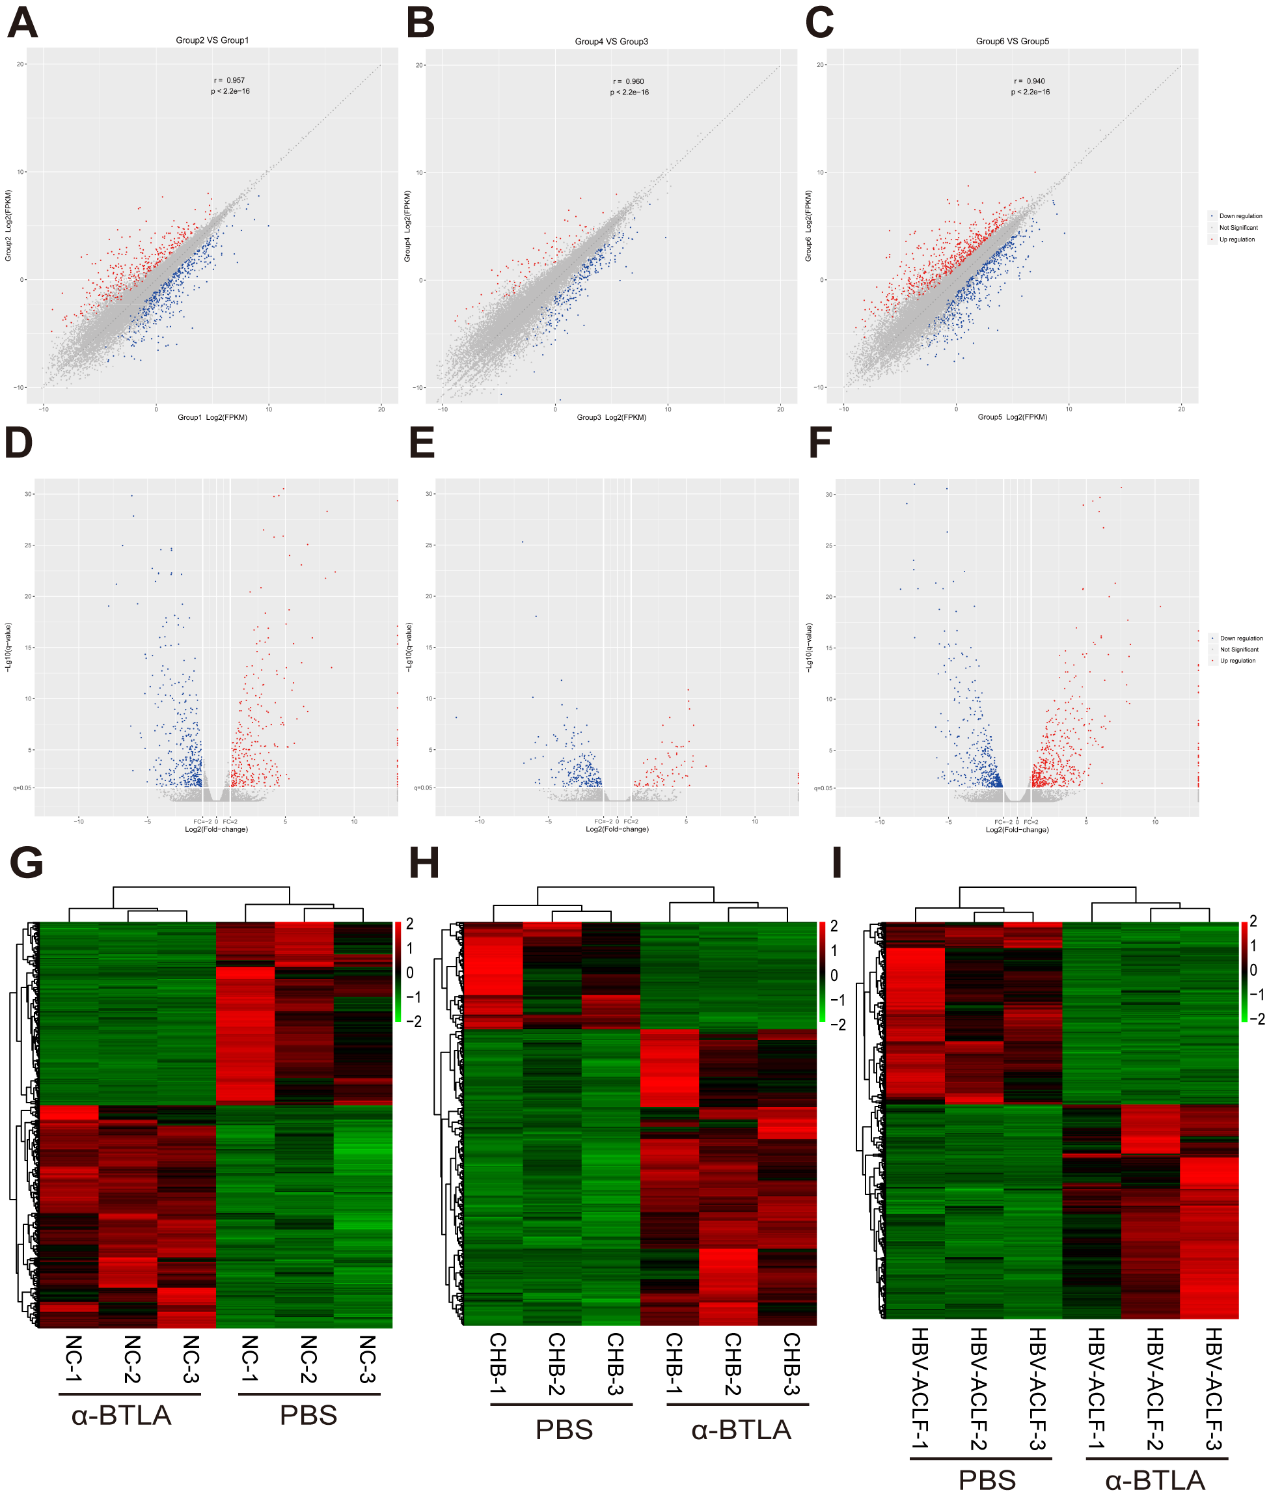


**Supplementary Fig. 8. Anti-BTLA crosslinking increases gene expression changes in NC**(*n = 3*)**, CHB**(*n = 3*)**, and HBV-ACLF patients**(*n = 3*). Correlation, volcano plot, and heatmap of gene expression of PBMC with or without anti-BTLA crosslinking from NC (*A, D, G*), CHB (*B, E, H*) and HBV-ACLF patients (*C, F, I*) are shown.

**Supplementary table 1. Demographic and clinical characteristics of subjects**

| **group** | **NC (*n* = 90)** | **CHB (*n* = 104)** | **HBV-ACLF ( *n* = 71)** |
| --- | --- | --- | --- |
| Sex (Male, %) | 29 (32.22%) | 82 (78.85%) c | 58 (81.69%) b |
| Age (years) | 30.00 (26.0-43.5) | 31.00 (26.00-40.75) | 45.00 (35.00-52.25) a, b |
| Hepatitis B virus s antigen (IU/ml） | - | 7250.00 (2240.38-20801.67) | 1141.76 (250.00-6055.56) |
| Hepatitis B virus e antigen (positive, %) | - | 81 (77.88%) | 28 (39.44%) a |
| HBV DNA (Lg IU/ml) | - | 7.34 (4.59-8.21) | 3.69 (2.70-6.13) a |
| Albumin (g/L) | - | 41.50 (39.30-44.50) | 33.00 (30.55-38.73) a |
| Total bilirubin (μmol/L) | - | 18.80 (12.70-40.95) | 365.70 (279.70-462.40) a |
| Alanine aminotransferase (IU/L) | - | 229.00 (126.50-473.50) | 103.00 (54.50-414.50) a |
| Aspartate aminotransferase (IU/L) | - | 110.00 (51.00-217.50) | 107.50 (65.75-231.00) |
| Alkaline phosphatase (U/L) | - | 90.00(71.00-122.00) | 131.00(104.50-156.00) a |
| γ-Glutamyl transferase (U/L) | - | 72.00(23.00-160.00) | 69.00(44.50-97.00) |
| Creatinine (μmol/L) | - | 81.70 (70.00-91.10) | 73.20(59.55-93.80) |
| Cholinesterase (U/L) | - | 6454.50 (5547.50-7372.00) | 2895.00 (2155.00-3745.00) a |
| White blood cell count (109/L) | - | 5.60 (4.50-6.70) | 6.09 (4.95-7.98) a |
| Neutrophil count (109/L) | - | 2.82 (2.18-4.24) | 4.03 (2.81-5.45) a |
| Haemoglobin (g/L) | - | 147.00 (133.25-156.75) | 122.50 (101.00-137.50) a |
| Platelet count (109/L) | - | 179.50(144.25-216.75) | 84.00(47.50-137.00) a |
| Prothrombin time (s) | - | 11.40 (10.90-12.20) | 22.50 (19.40-27.90) a |
| International normalized ratio | - | 1.03 (0.98-1.10) | 2.09 (1.67-2.47) a |
| C-reactive protein (mg/L) | - | 3.58 (2.27-5.53) | 11.05 (6.50-16.93) a |
| Procalcitonin (ng/ml) | - | - | 0.63 (0.45-0.97) |
| Good prognosis n (%) | - | - | 32 (45.07%) |
| Bacterial infection n (%) | - | - | 44 (61.97%) |
| Ascites n (%) | - | - | 44 (61.97%) |
| Portal hypertension n (%) | - | - | 47 (66.20%) |
| Hepatic encephalopathy n (%) | - | - | 12 (16.90%) |
| ACLF grade 1/2/3 (n) | - | - | 48/15/8 |
| Child-pugh score | - | - | 11.0 (10.0-12.0) |
| MELD score | - | - | 23.94 (20.61-28.50) |
| CLIF-SOFA | - | - | 10.00 (7.00-11.00) |
| CLIF-C ACLFs | - | - | 36.53 (32.64-44.95) |
| COSSH-ACLFs | - | - | 8.69 (7.12-9.88) |

Results are expressed as medians and interquartile ranges. A significant difference comparing HBV-ACLF to CHB patients and b comparing HBV-ACLF to NC.

**Supplementary table 2. Specific primers for BTLA, stat3, 16S, and β-actin**

| Gene | Forward (5′-3′) | Reverse (5′-3′) |
| --- | --- | --- |
| BTLA | TCTTTATGTGACAGGAAAGCAAA | CAGACCCTTCCTGCATCCTG |
| Stat3 | CTTTGAGACCGAGGTGTATCACC | GGTCAGCATGTTGTACCACAGG |
| 16S | AACTGGAGGAAGGTGGGGAT | AGGAGGTGATCCAACCGCA |
| β-actin | AGAGCTACGAGCT GCCTGAC | AGCACTGTGTTGGCGTACAG |

Reference

1. Yu XP, Guo R, Ming D, Deng Y, Su M, Lin C, et al. The Transforming Growth Factor beta1/Interleukin-31 Pathway Is Upregulated in Patients with Hepatitis B Virus-Related Acute-on-Chronic Liver Failure and Is Associated with Disease Severity and Survival. Clin Vaccine Immunol. 2015;22:484-92.

2. Zhang Z, Zou ZS, Fu JL, Cai L, Jin L, Liu YJ, et al. Severe dendritic cell perturbation is actively involved in the pathogenesis of acute-on-chronic hepatitis B liver failure. J Hepatol. 2008;49:396-406.

3. Han Y, Chen Z, Yang Y, Jiang Z, Gu Y, Liu Y, et al. Human CD14+ CTLA-4+ regulatory dendritic cells suppress T-cell response by cytotoxic T-lymphocyte antigen-4-dependent IL-10 and indoleamine-2,3-dioxygenase production in hepatocellular carcinoma. Hepatology. 2014;59:567-79.

4. Bernsmeier C, Triantafyllou E, Brenig R, Lebosse FJ, Singanayagam A, Patel VC, et al. CD14(+) CD15(-) HLA-DR(-) myeloid-derived suppressor cells impair antimicrobial responses in patients with acute-on-chronic liver failure. Gut. 2018;67:1155-67.

5. Shubin NJ, Chung CS, Heffernan DS, Irwin LR, Monaghan SF, Ayala A. BTLA expression contributes to septic morbidity and mortality by inducing innate inflammatory cell dysfunction. J Leukoc Biol. 2012;92:593-603.

6. Mahnke YD, Beddall MH, Roederer M. OMIP-017: human CD4(+) helper T-cell subsets including follicular helper cells. Cytometry A. 2013;83:439-40.
